# Supplementary material for: A cost-effective NiMoB–La(OH)3 catalyst for hydrogen generation from decomposition of alkaline hydrous hydrazine solution
Source: Royal Society of Chemistry journal article supplement (doi:10.1039/c3ta12528a), 2013-01-01
Supplement: c3ta12528a.pdf [file c3ta12528a.pdf]

## Electronic Supplementary Information

### **A cost-effective NiMoB–La(OH)<sub>3</sub> catalyst for hydrogen generation by decomposition of alkaline hydrazine solution**

Jingjing Zhang <sup>a</sup>, Qiang Kang <sup>b</sup>, Zhiqing Yang <sup>a</sup>, Hongbin Dai <sup>a\*</sup>, Dawei Zhuang <sup>a</sup> and Ping Wang <sup>a\*</sup>

<sup>a</sup> *Shenyang National Laboratory for Materials Science, Institute of Metal Research, Chinese Academy of Sciences, 72 Wenhua Road, Shenyang 110016, P.R. China*

<sup>b</sup> *Analysis & Testing Division, Institute of Metal Research, Chinese Academy of Sciences, 72 Wenhua Road, Shenyang 110016, P.R. China*

Summary: 3 Pages; 2 Tables; 2 Figures

**Table S1** A comparison of catalytic decomposition performance of  $\text{N}_2\text{H}_4 \cdot \text{H}_2\text{O}$  using 55 wt%  $\text{Ni}_{64.1}\text{Mo}_{11.5}\text{B}_{24.4}\text{-La(OH)}_3$  and other catalysts from open literature

| Catalyst                                                          | Reaction condition                                |                             |             |                                 |  | TOF<br>( $\text{h}^{-1}$ ) | Ref.      |
|-------------------------------------------------------------------|---------------------------------------------------|-----------------------------|-------------|---------------------------------|--|----------------------------|-----------|
|                                                                   | Catalyst/ $\text{N}_2\text{H}_4$<br>(molar ratio) | T<br>( $^{\circ}\text{C}$ ) | NaOH<br>(M) | $\text{H}_2$ selectivity<br>(%) |  |                            |           |
| $\text{Ni}_{0.95}\text{Ir}_{0.05}$                                | 0.1                                               | 25                          | 0           | 100                             |  | 1.6                        | [8]       |
| $\text{Ni}_{0.99}\text{Pt}_{0.01}$                                | 0.1                                               | 70                          | 0           | 100                             |  | 6                          | [9]       |
| $\text{NiPt}_{0.057}\text{-Al}_2\text{O}_3\text{-HT}$             | 0.4                                               | 30                          | 0           | 98                              |  | 16.8                       | [10]      |
| $\text{Rh}_4\text{Ni/GO}$                                         | 0.1                                               | 25                          | 5           | 100                             |  | 12                         | [11]      |
| $\text{Ni}_{50}\text{Fe}_{50}$                                    | 0.1                                               | 70                          | 0.4         | 100                             |  | 3.2                        | [13]      |
| $\text{Ni}_3\text{Fe/C}$                                          | —                                                 | 25                          | 0           | 100                             |  | 556                        | [14]      |
| $\text{Ni-Al}_2\text{O}_3\text{-HT}$                              | 0.4                                               | 30                          | 0           | 93                              |  | 2.2                        | [15]      |
| $\text{Ni}_{64.1}\text{Mo}_{11.5}\text{B}_{24.4}\text{-La(OH)}_3$ | 0.3                                               | 50                          | 2           | 100                             |  | 13.3                       | This work |

**Table S2** XPS binding energies (eV) of the  $\text{Ni}_{74.1}\text{B}_{25.9}$ ,  $\text{Ni}_{66.2}\text{Mo}_{9.6}\text{B}_{24.2}$  and 55 wt%  $\text{Ni}_{64.1}\text{Mo}_{11.5}\text{B}_{24.4}\text{-La(OH)}_3$  catalysts

| Sample                                           | Element                                                                  | Peak BE (eV)                               | Likely metal/compound  |
|--------------------------------------------------|--------------------------------------------------------------------------|--------------------------------------------|------------------------|
| $\text{Ni}_{74.1}\text{B}_{25.9}$                | $\text{Ni}2\text{p}_{3/2}/2\text{p}_{1/2}$                               | 852.4/870                                  | $\text{Ni}^0$          |
|                                                  |                                                                          | 853.1/871.5                                | $\text{NiO/Ni(OH)}_2$  |
|                                                  |                                                                          | 856.7/874.9                                |                        |
|                                                  | B 1s                                                                     | 187.8                                      | $\text{B}^0$           |
|                                                  |                                                                          | 192                                        | $\text{B}_2\text{O}_3$ |
| $\text{Ni}_{66.2}\text{Mo}_{9.6}\text{B}_{24.2}$ | $\text{Ni}2\text{p}_{3/2}/2\text{p}_{1/2}$                               | 852.1/869.6                                | $\text{Ni}^0$          |
|                                                  |                                                                          | 852.8/871.2                                | $\text{NiO/Ni(OH)}_2$  |
|                                                  |                                                                          | 857/875.5                                  |                        |
|                                                  | Mo $3\text{d}_{5/2}/3\text{d}_{3/2}$                                     | 228.3/231.4                                | $\text{Mo}^0$          |
|                                                  |                                                                          | 229.5/232.6                                | $\text{MoO}_2$         |
|                                                  |                                                                          | 232.4/235.5                                | $\text{MoO}_3$         |
|                                                  | B 1s                                                                     | 187.4                                      | $\text{B}^0$           |
|                                                  |                                                                          | 191.7                                      | $\text{B}_2\text{O}_3$ |
|                                                  | 55 wt% $\text{Ni}_{64.1}\text{Mo}_{11.5}\text{B}_{24.4}\text{-La(OH)}_3$ | $\text{Ni}2\text{p}_{3/2}/2\text{p}_{1/2}$ | 852.1/869.5            |
| 852.8/872.3                                      |                                                                          |                                            | $\text{NiO/Ni(OH)}_2$  |
| 859.2/872.7                                      |                                                                          |                                            |                        |
| Mo $3\text{d}_{5/2}/3\text{d}_{3/2}$             |                                                                          | 228.1/231.1                                | $\text{Mo}^0$          |
|                                                  |                                                                          | 229.7/232.9                                | $\text{MoO}_2$         |
|                                                  |                                                                          | 232.5/235.7                                | $\text{MoO}_3$         |
| B 1s                                             |                                                                          | 191                                        | $\text{B}_2\text{O}_3$ |
|                                                  |                                                                          | La $3\text{d}_{5/2}$                       | 834.4–838.1            |

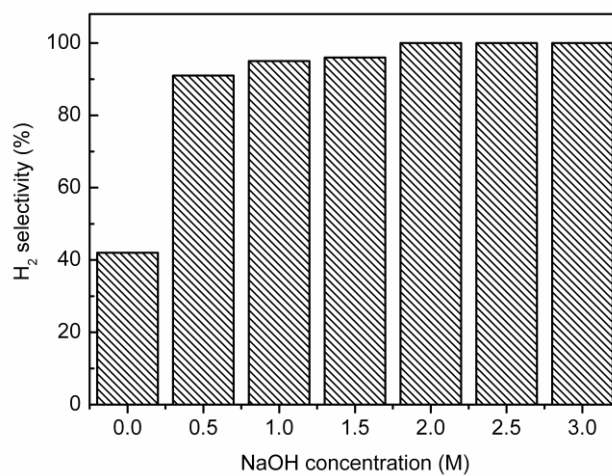

**Fig. S1** Effect of NaOH concentration on H<sub>2</sub> selectivity of the system composed of 4 mL of 0.5 M N<sub>2</sub>H<sub>4</sub>·H<sub>2</sub>O solution with the presence of 55wt% Ni<sub>64.1</sub>Mo<sub>11.5</sub>B<sub>24.4</sub>-La(OH)<sub>3</sub> catalyst (catalyst/N<sub>2</sub>H<sub>4</sub>·H<sub>2</sub>O = 0.3) at 50 °C.

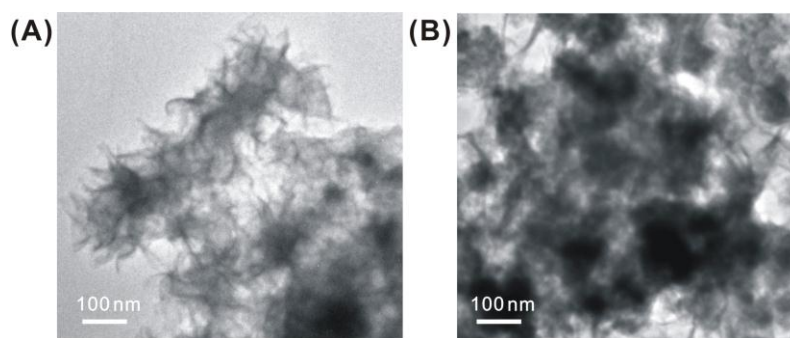

**Fig. S2** TEM images of 55 wt% Ni<sub>64.1</sub>Mo<sub>11.5</sub>B<sub>24.4</sub>-La(OH)<sub>3</sub> catalyst before (A) and after (B) reaction with N<sub>2</sub>H<sub>4</sub>·H<sub>2</sub>O.
